# Supplementary material for: Intracellular delivery of peptide cargos using iron oxide based nanoparticles: studies on antitumor efficacy of a BCL-2 converting peptide, NuBCP-9
Source: Royal Society of Chemistry journal article supplement (doi:10.1039/c4nr04504a), 2014-01-01
Supplement: c4nr04504a1.pdf [file c4nr04504a1.pdf]

## Electronic Supplementary Information

### **Intracellular delivery of peptide cargos using iron oxide based nanoparticles: studies on antitumor efficacy of BCL-2 converting peptide, NuBCP-9**

Manoj Kumar<sup>a</sup>, Gurpal Singh<sup>a</sup>, Sapna Sharma<sup>a</sup>, Dikshi Gupta<sup>a</sup>, Vivek Bansal<sup>a</sup>, Vikas Arora<sup>b</sup>, Madhusudan Bhat<sup>c</sup>, Sandeep K. Srivastava<sup>c</sup>, Sameer Sapra<sup>b</sup>, Surender Kharbanda<sup>d</sup>, Amit K. Dinda<sup>c</sup> and Harpal Singh<sup>†a</sup>

<sup>a</sup>Center for Biomedical Engineering, Indian Institute of Technology, Hauz Khas, New Delhi-110016, India;

<sup>b</sup>Department of Chemistry, Indian Institute of Technology, Hauz Khas, New Delhi-110016, India

<sup>c</sup>Department of Pathology, All India Institute of Medical Sciences, Ansari Nagar New Delhi-110029, India;

<sup>d</sup>Department of Medical Oncology, Dana-Farber Cancer Institute, Harvard Medical School, Boston, MA 02115, USA

#### **Results:**

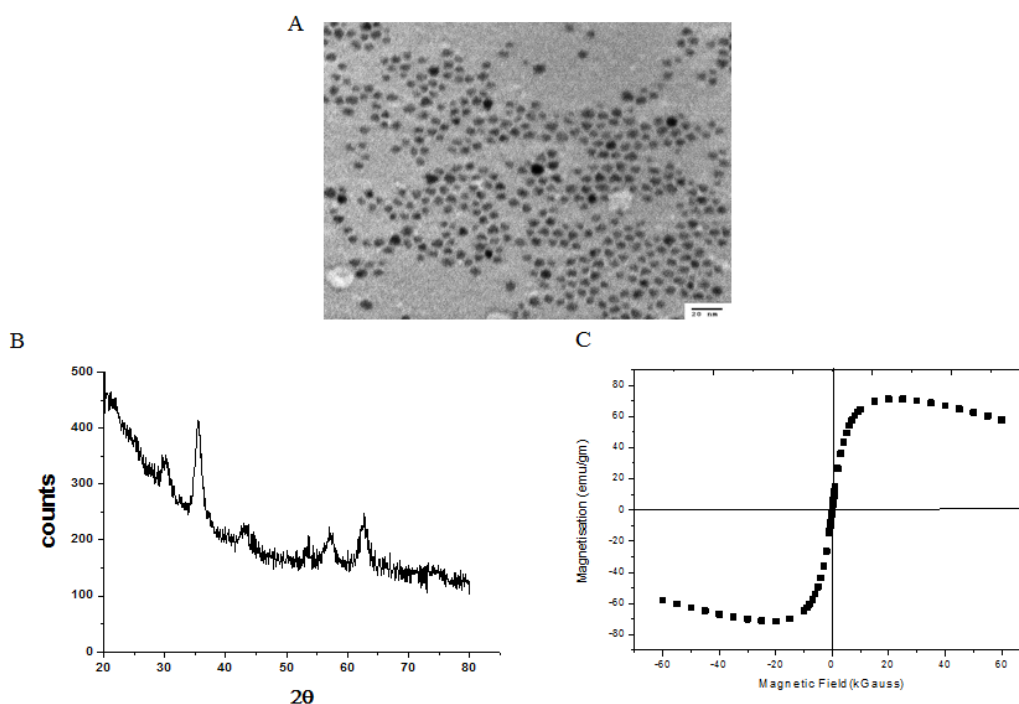

**Figure S1:** Characterization of hydrophobic SPIONs. (A) TEM (B) XRD (C) SQUID.

**Abbreviations:** TEM, transmission electron micrograph; XRD, X-ray diffraction; SAED, single area electron diffraction pattern; SQUID, superconducting quantum interference device.
